# Supplementary figures and images for: Automating the solution of PDEs on the sphere and other manifolds in FEniCS 1.2
Source: Copernicus journal article supplement (doi:10.5194/gmd-6-2099-2013), 2013-12-17

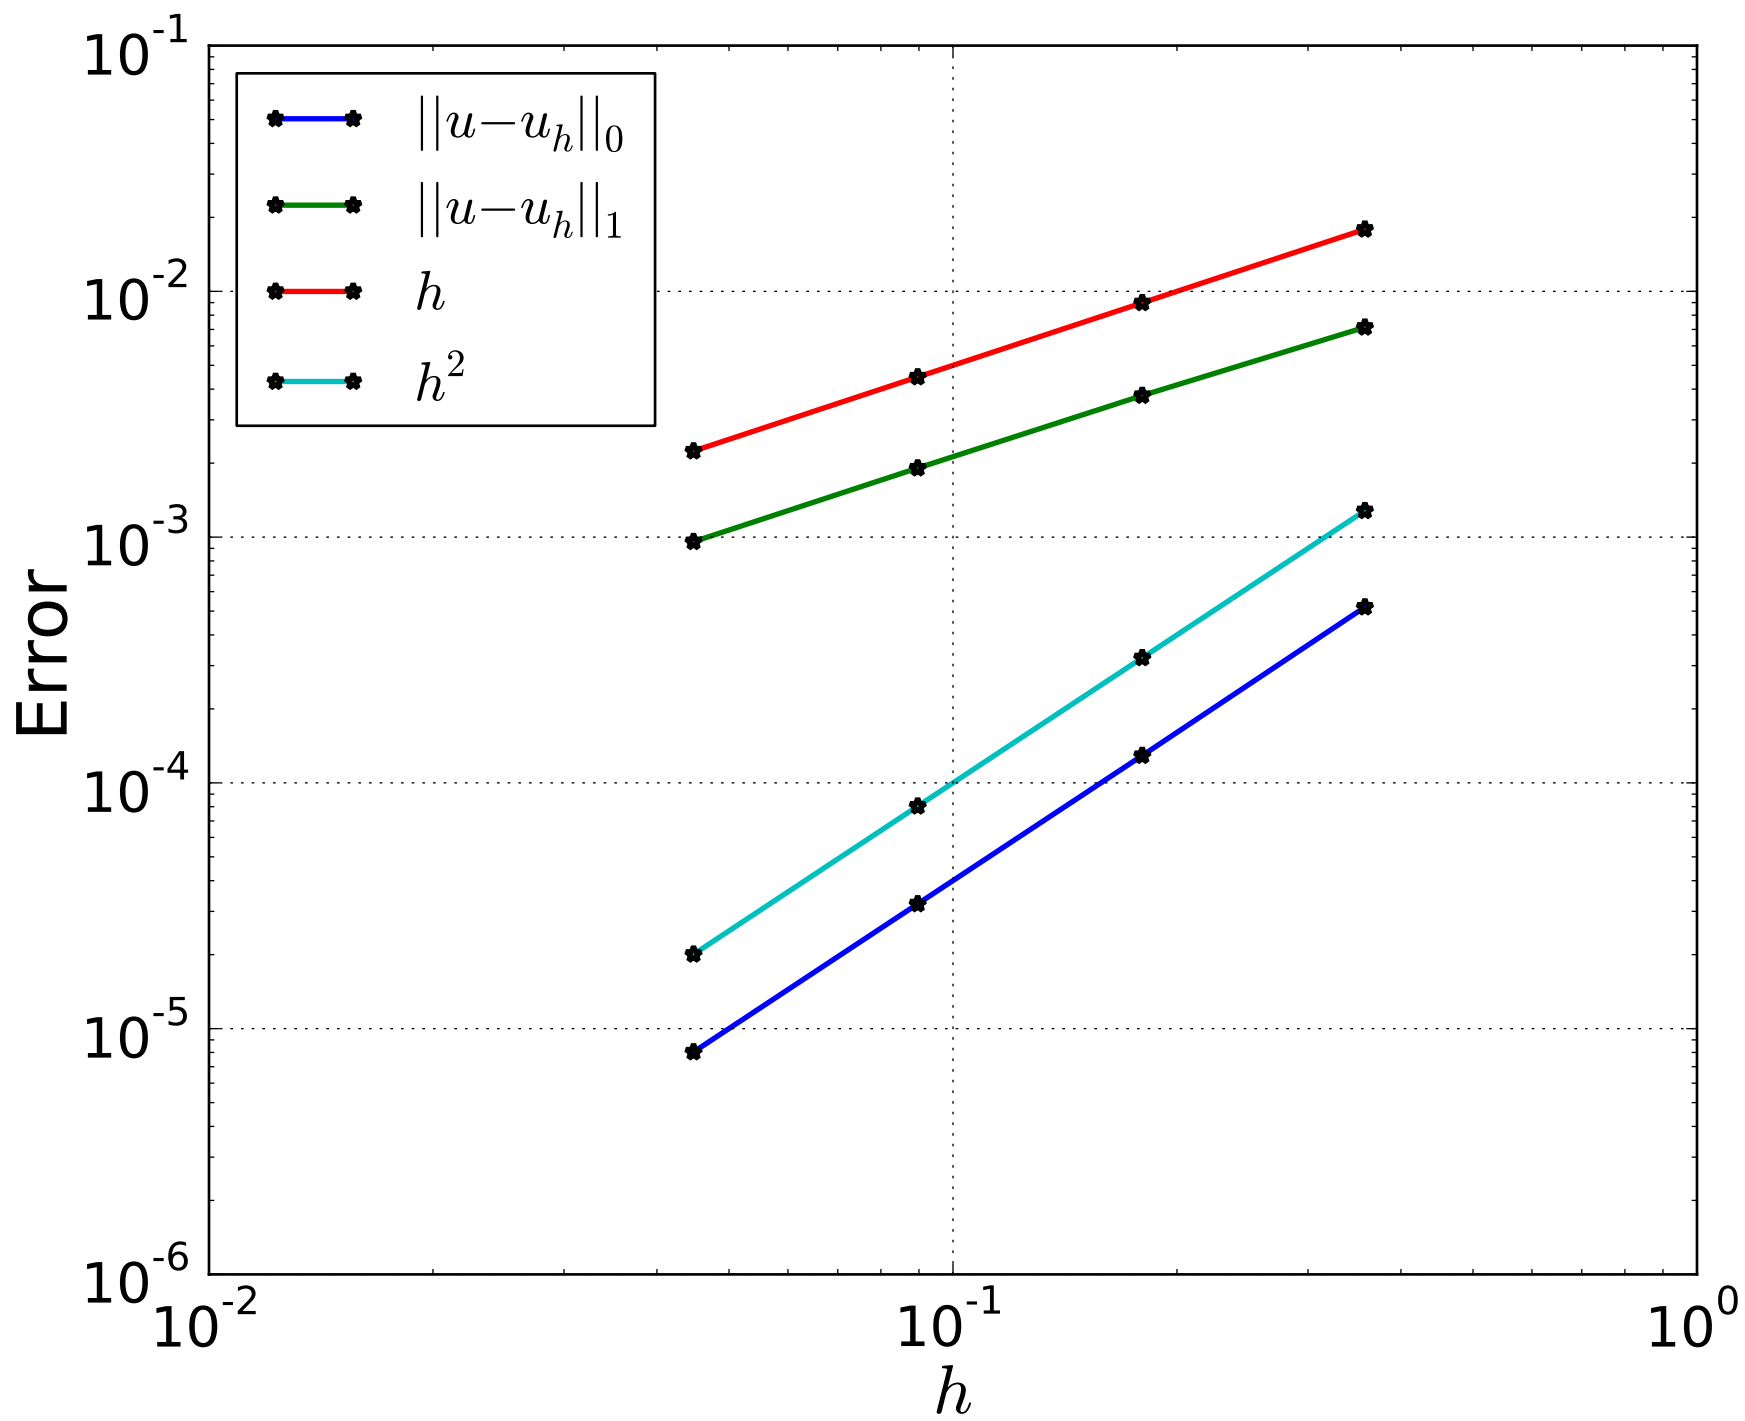

Supplement: Supplementary file 1 [file gmd-6-2099-2013-supplement.zip]

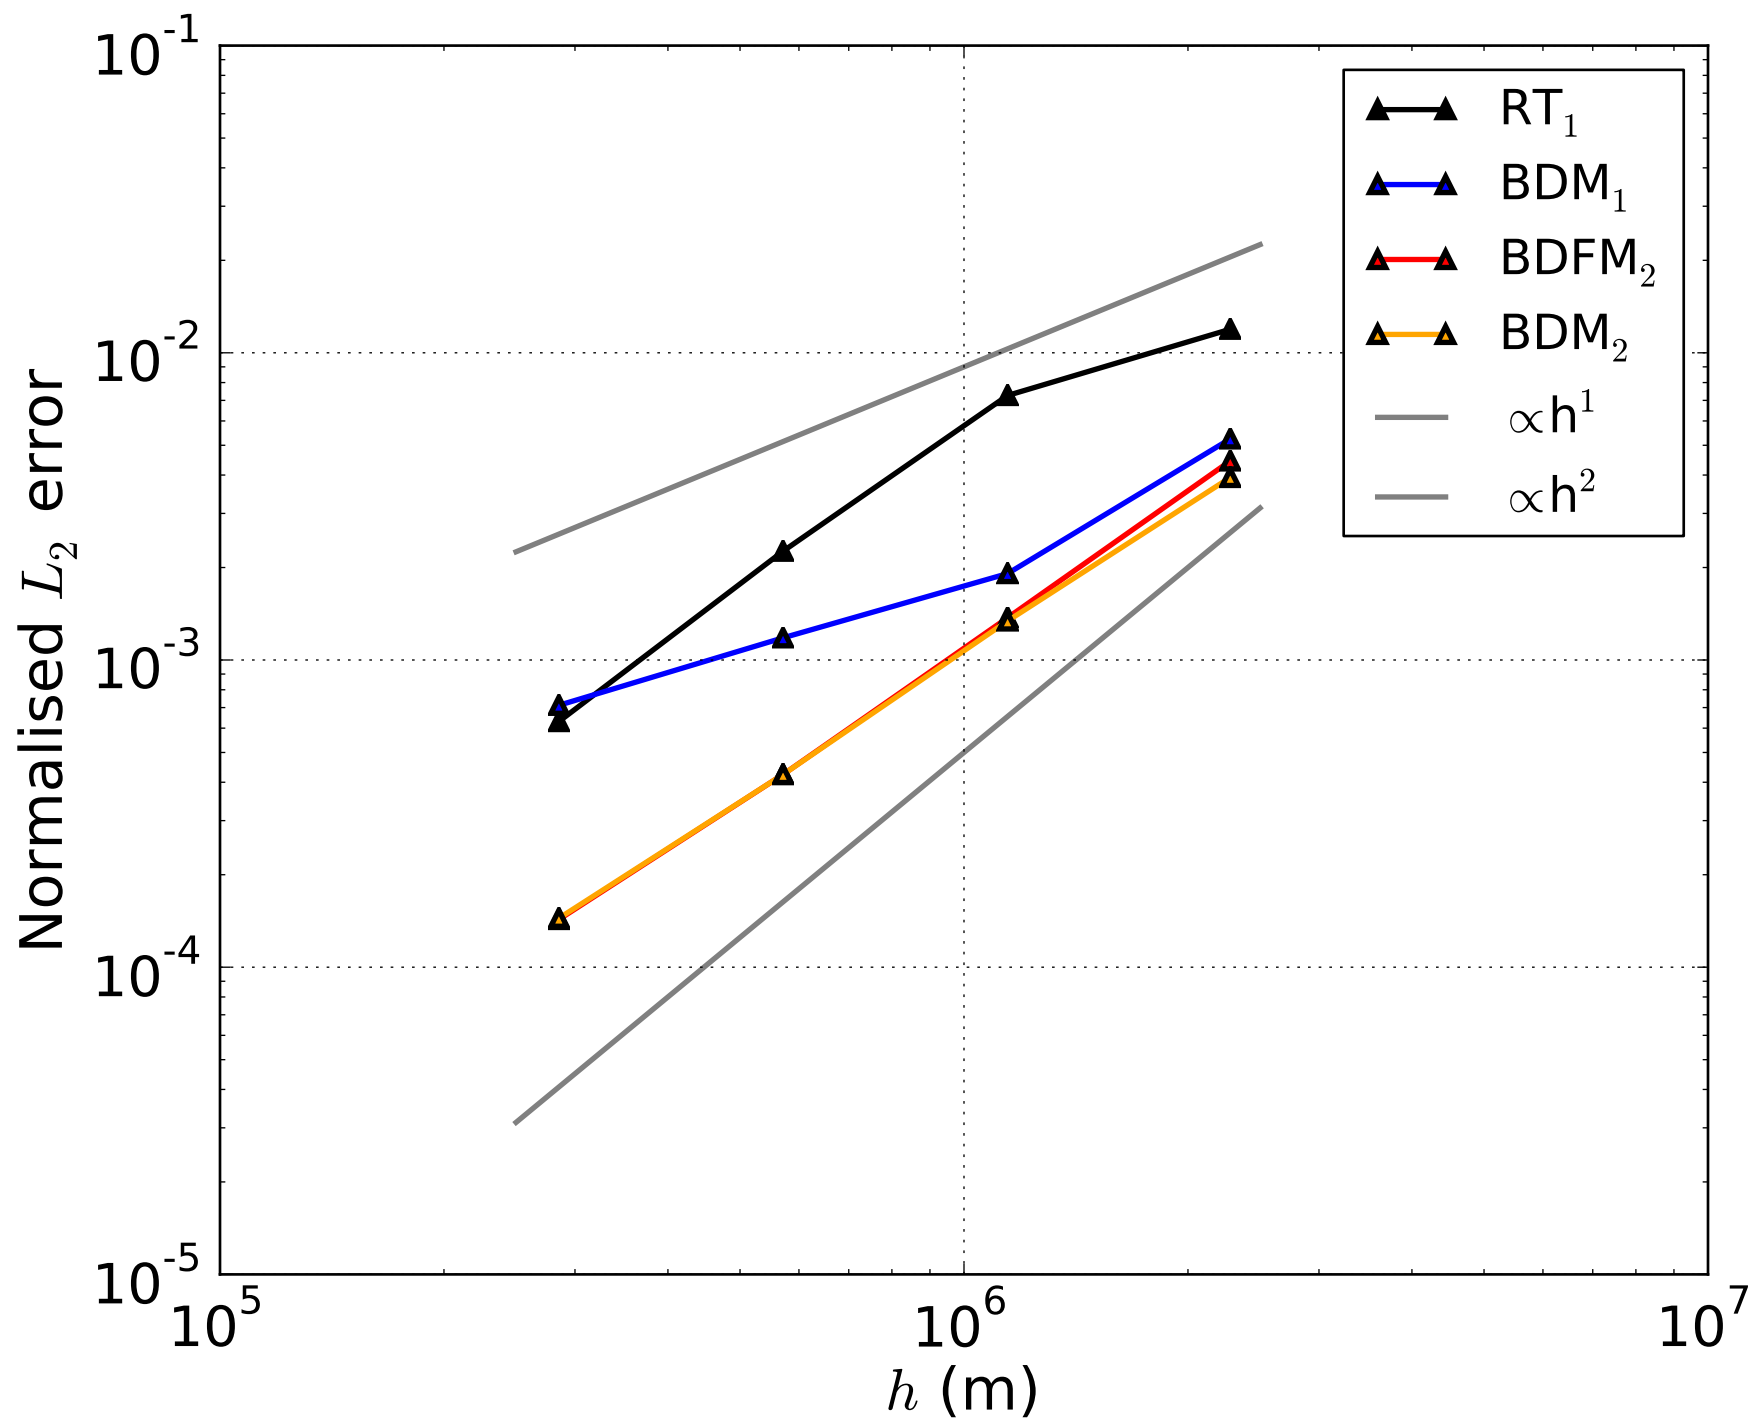

Supplement: Supplementary file 2 [file gmd-6-2099-2013-supplement.zip]

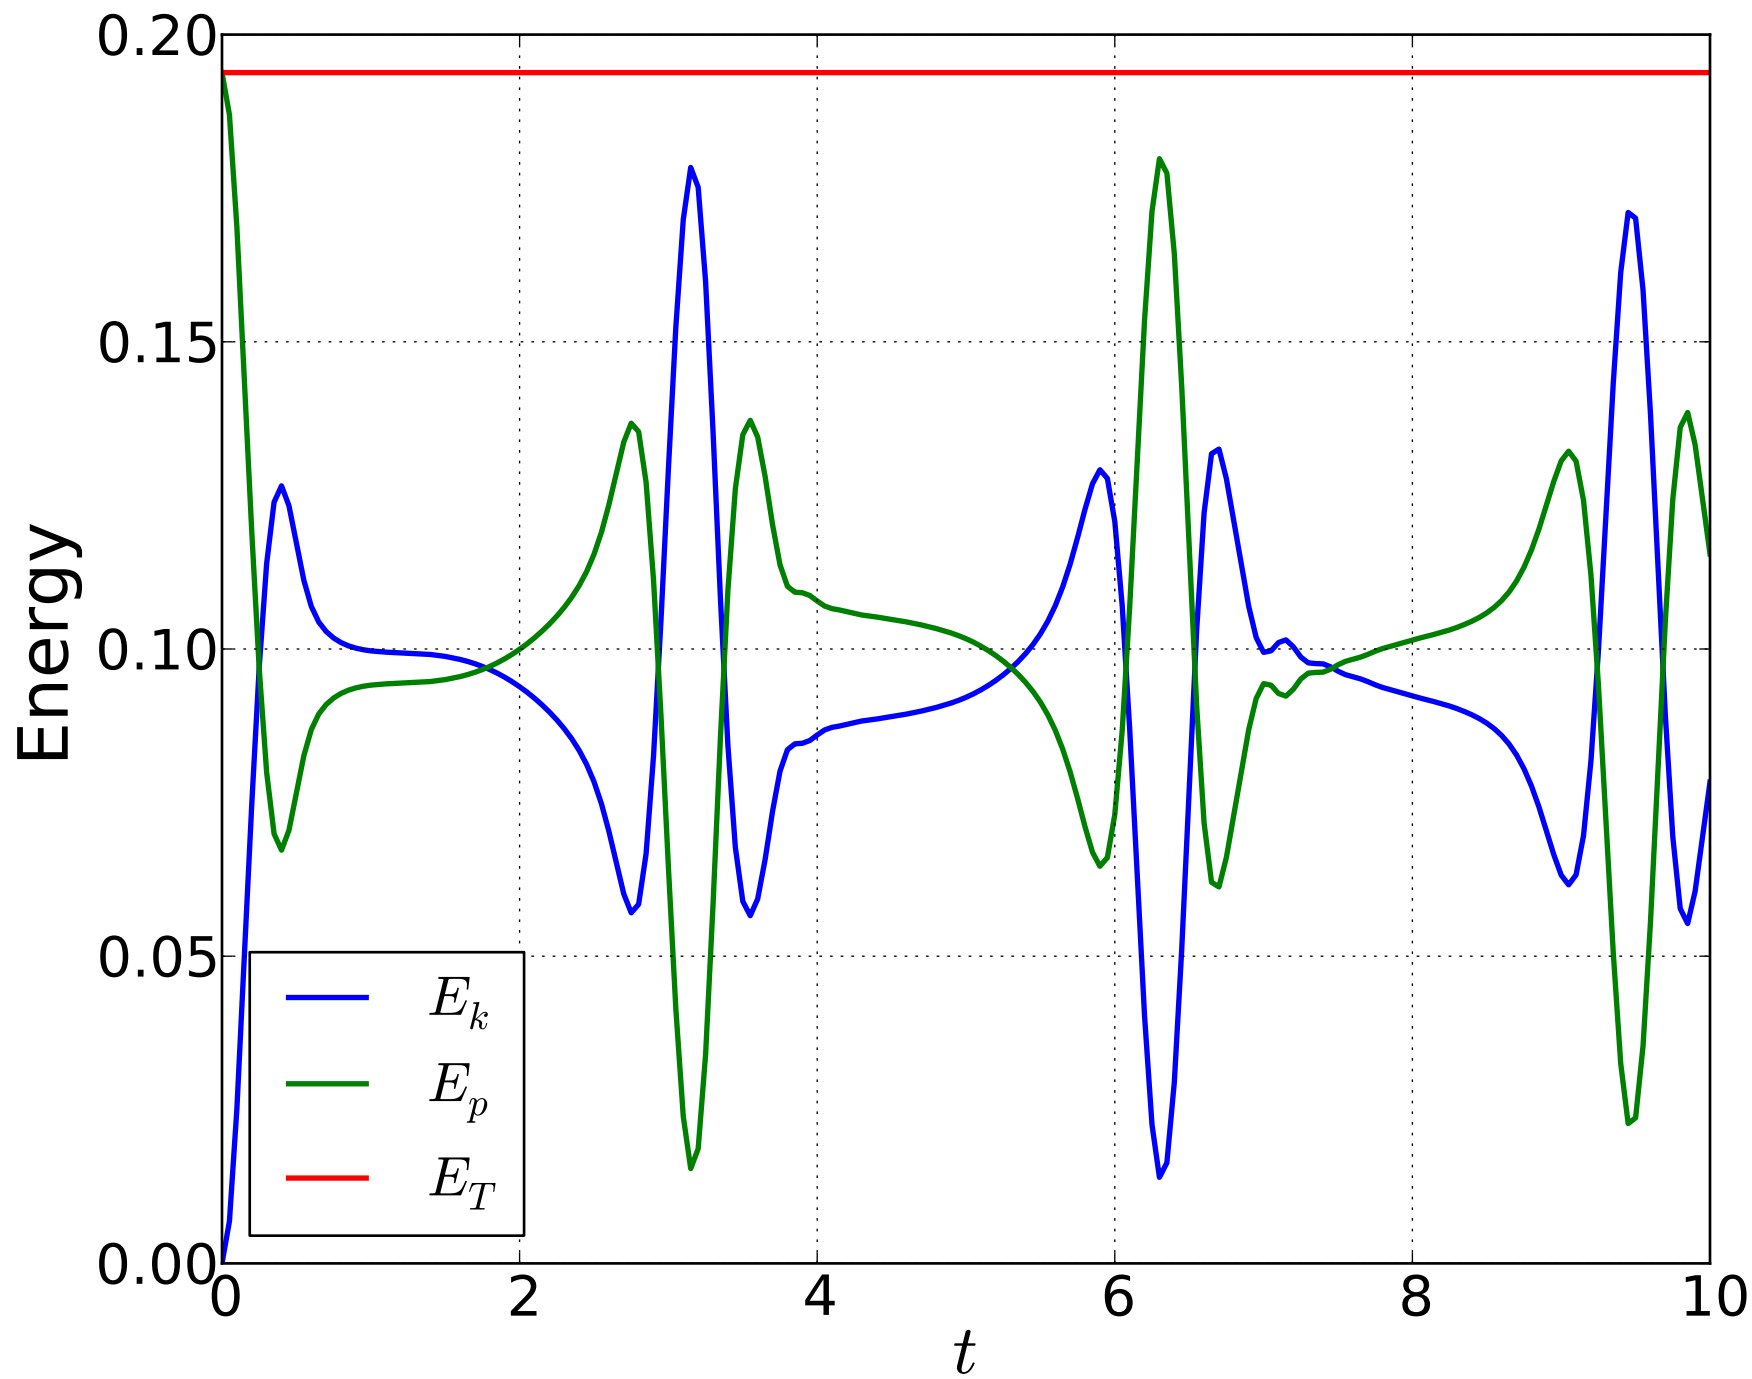

Supplement: Supplementary file 3 [file gmd-6-2099-2013-supplement.zip]

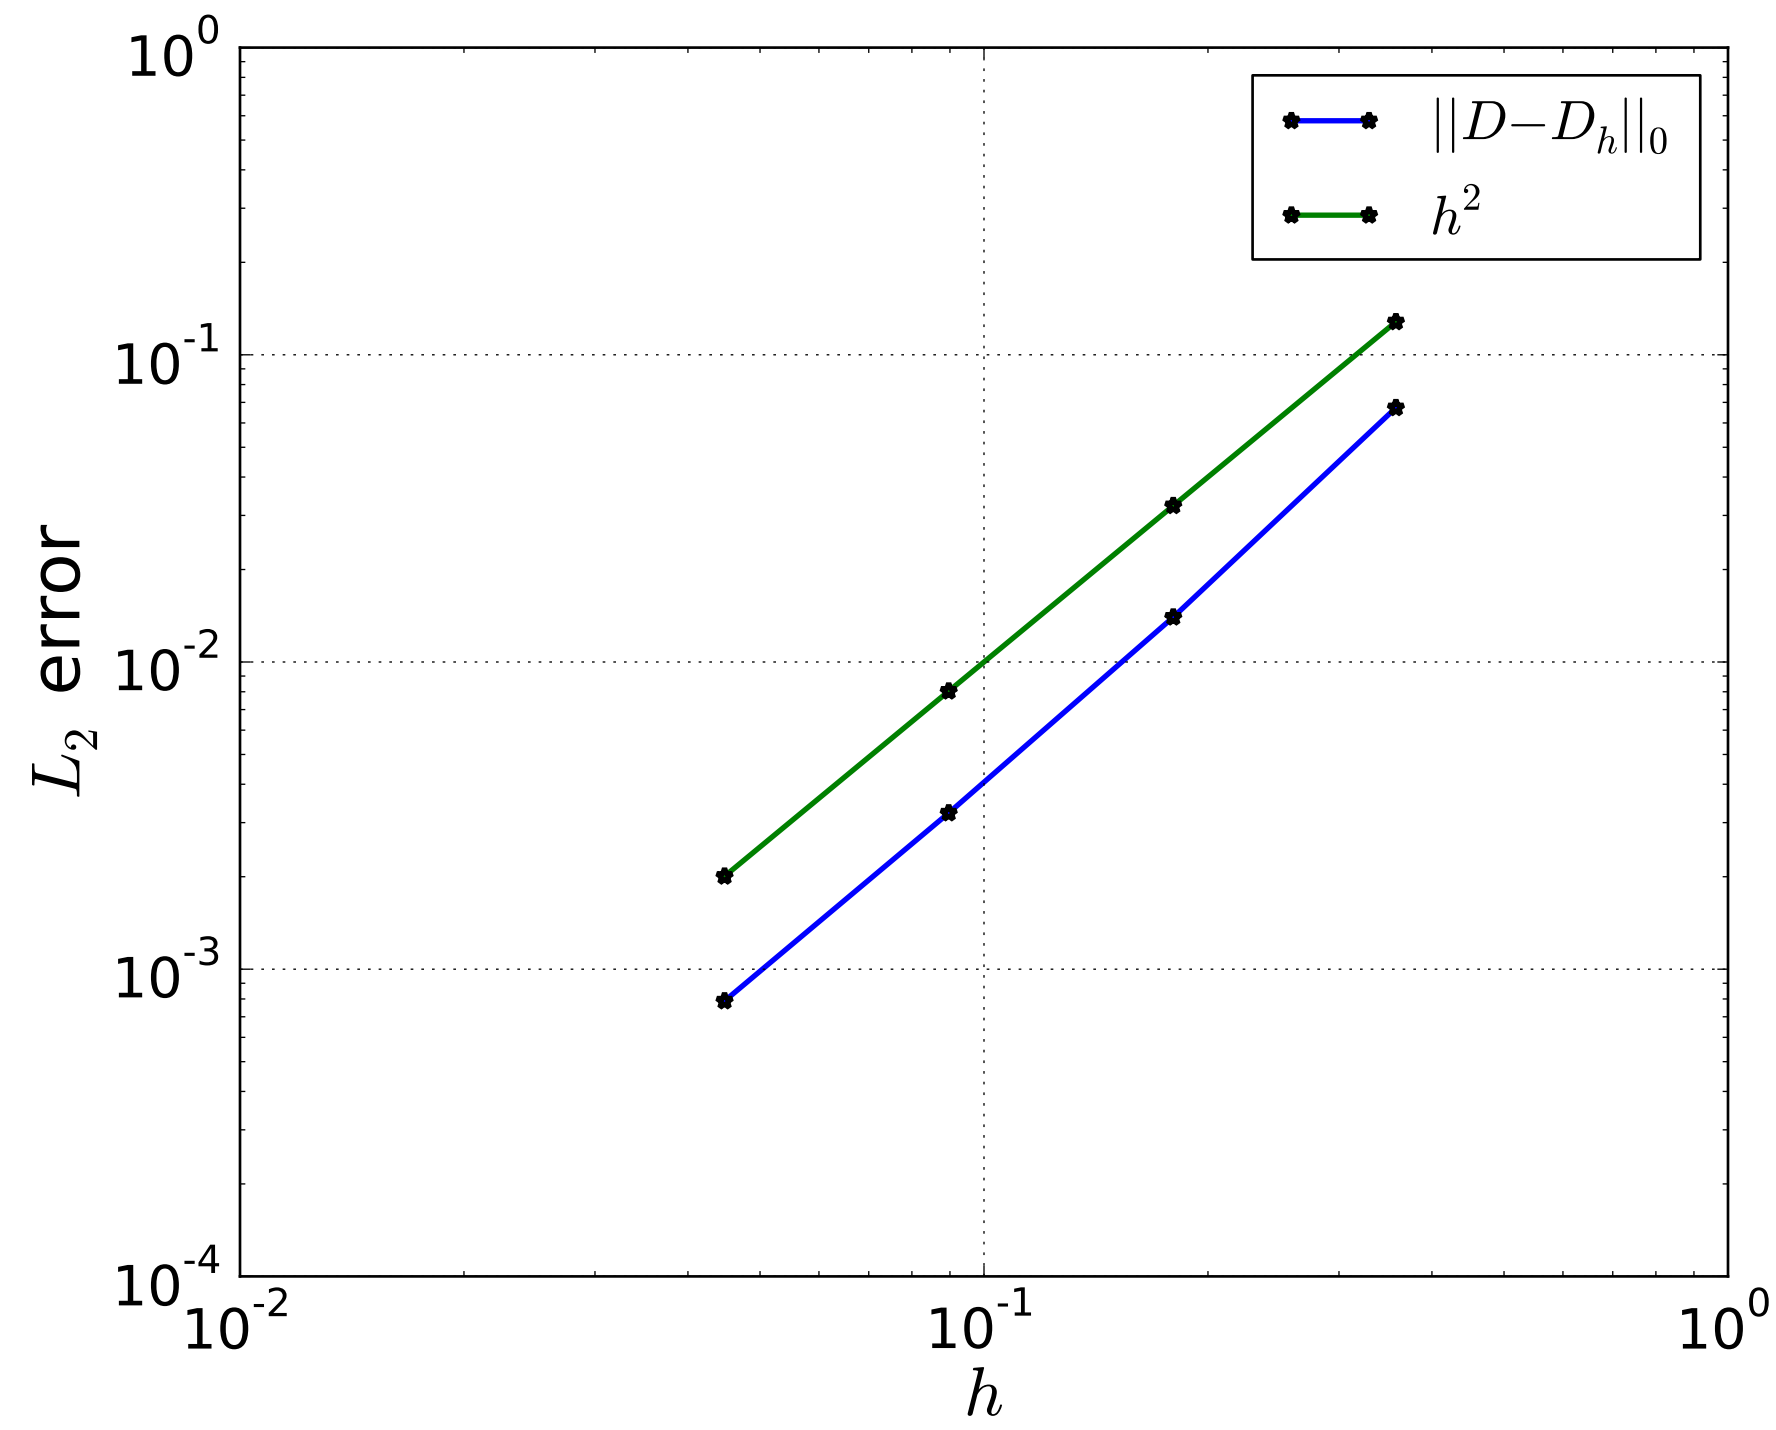

Supplement: Supplementary file 4 [file gmd-6-2099-2013-supplement.zip]

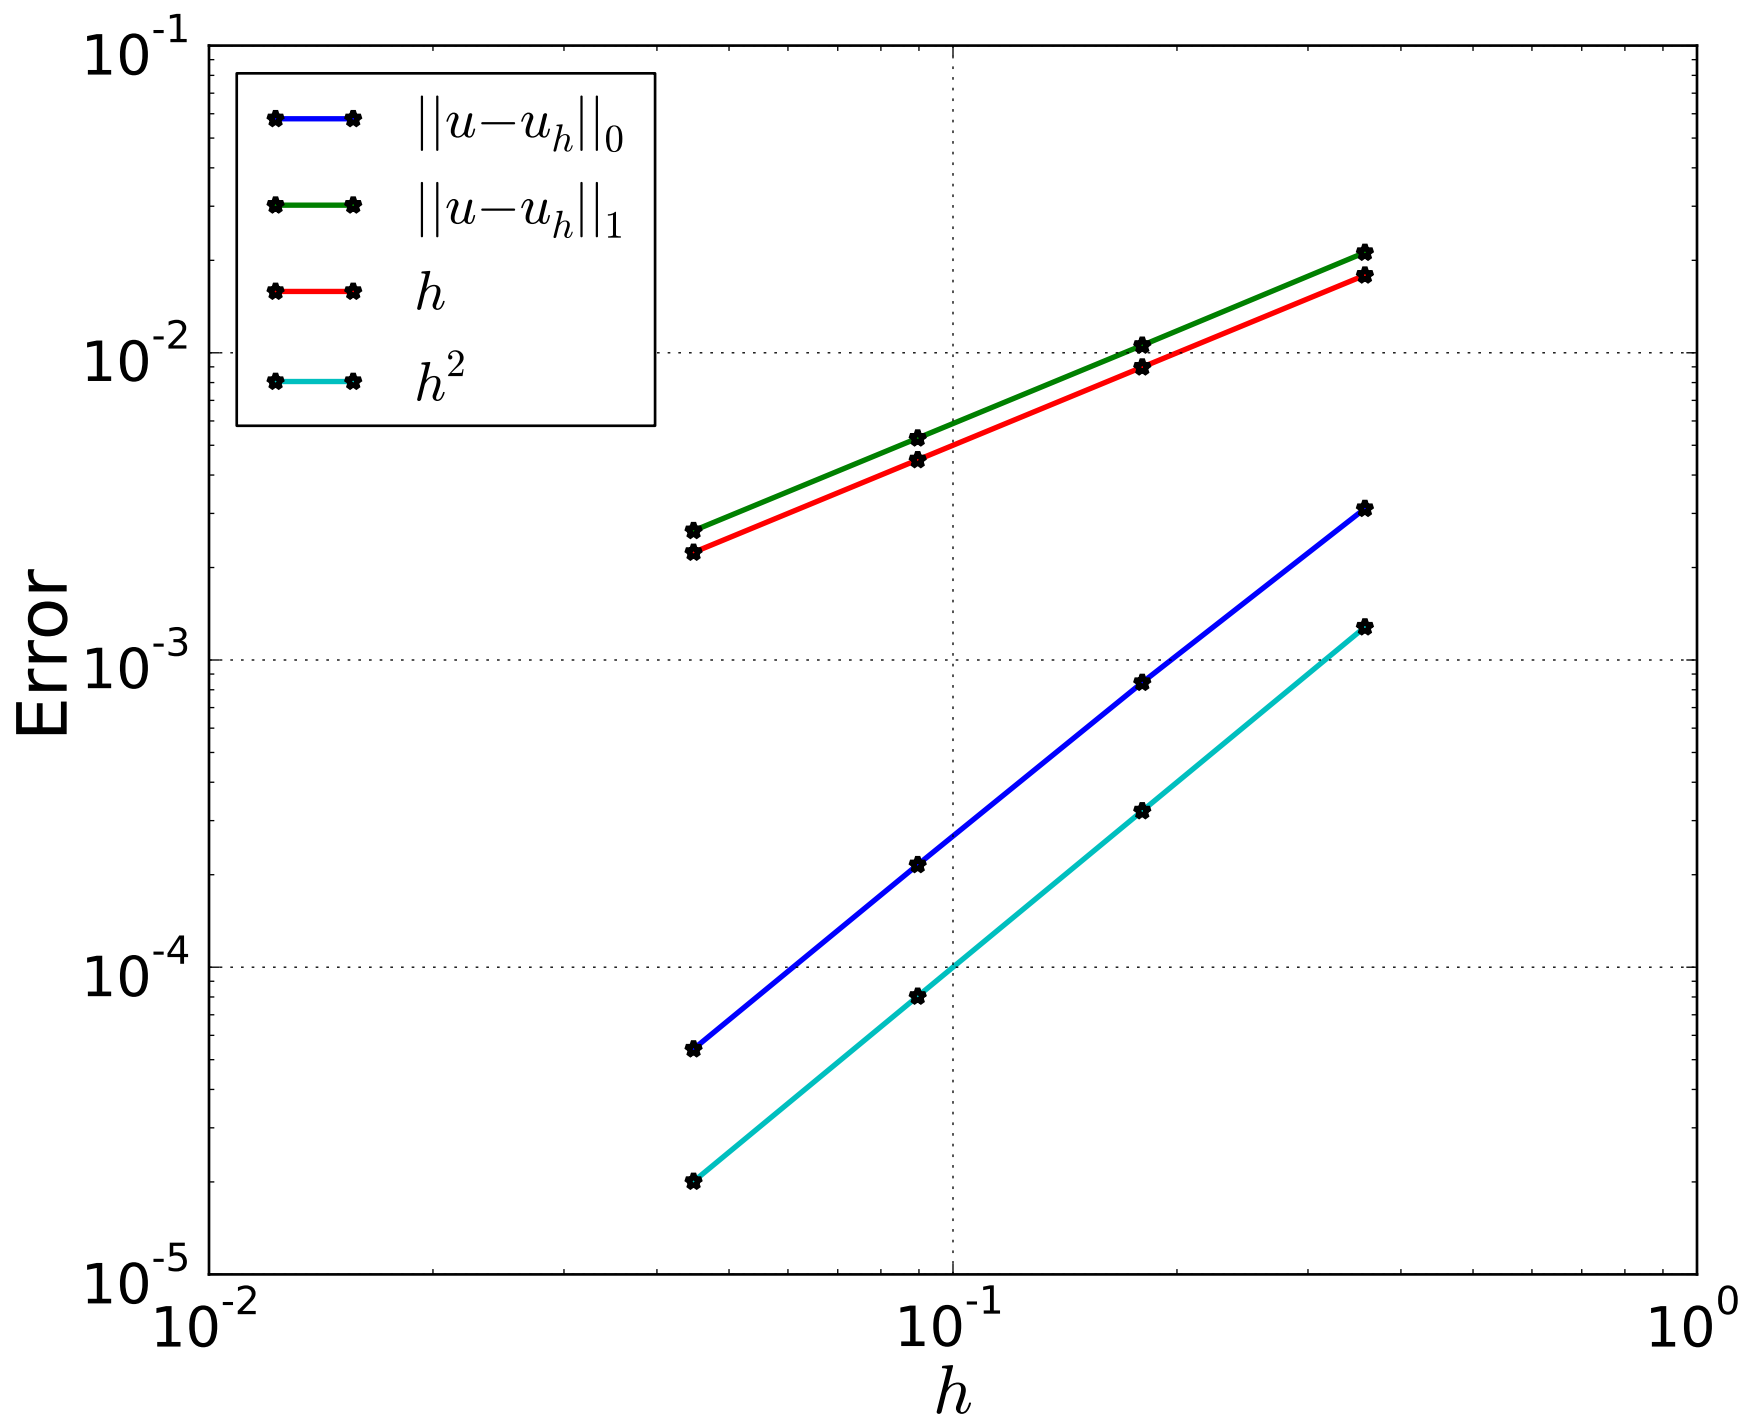

Supplement: Supplementary file 5 [file gmd-6-2099-2013-supplement.zip]

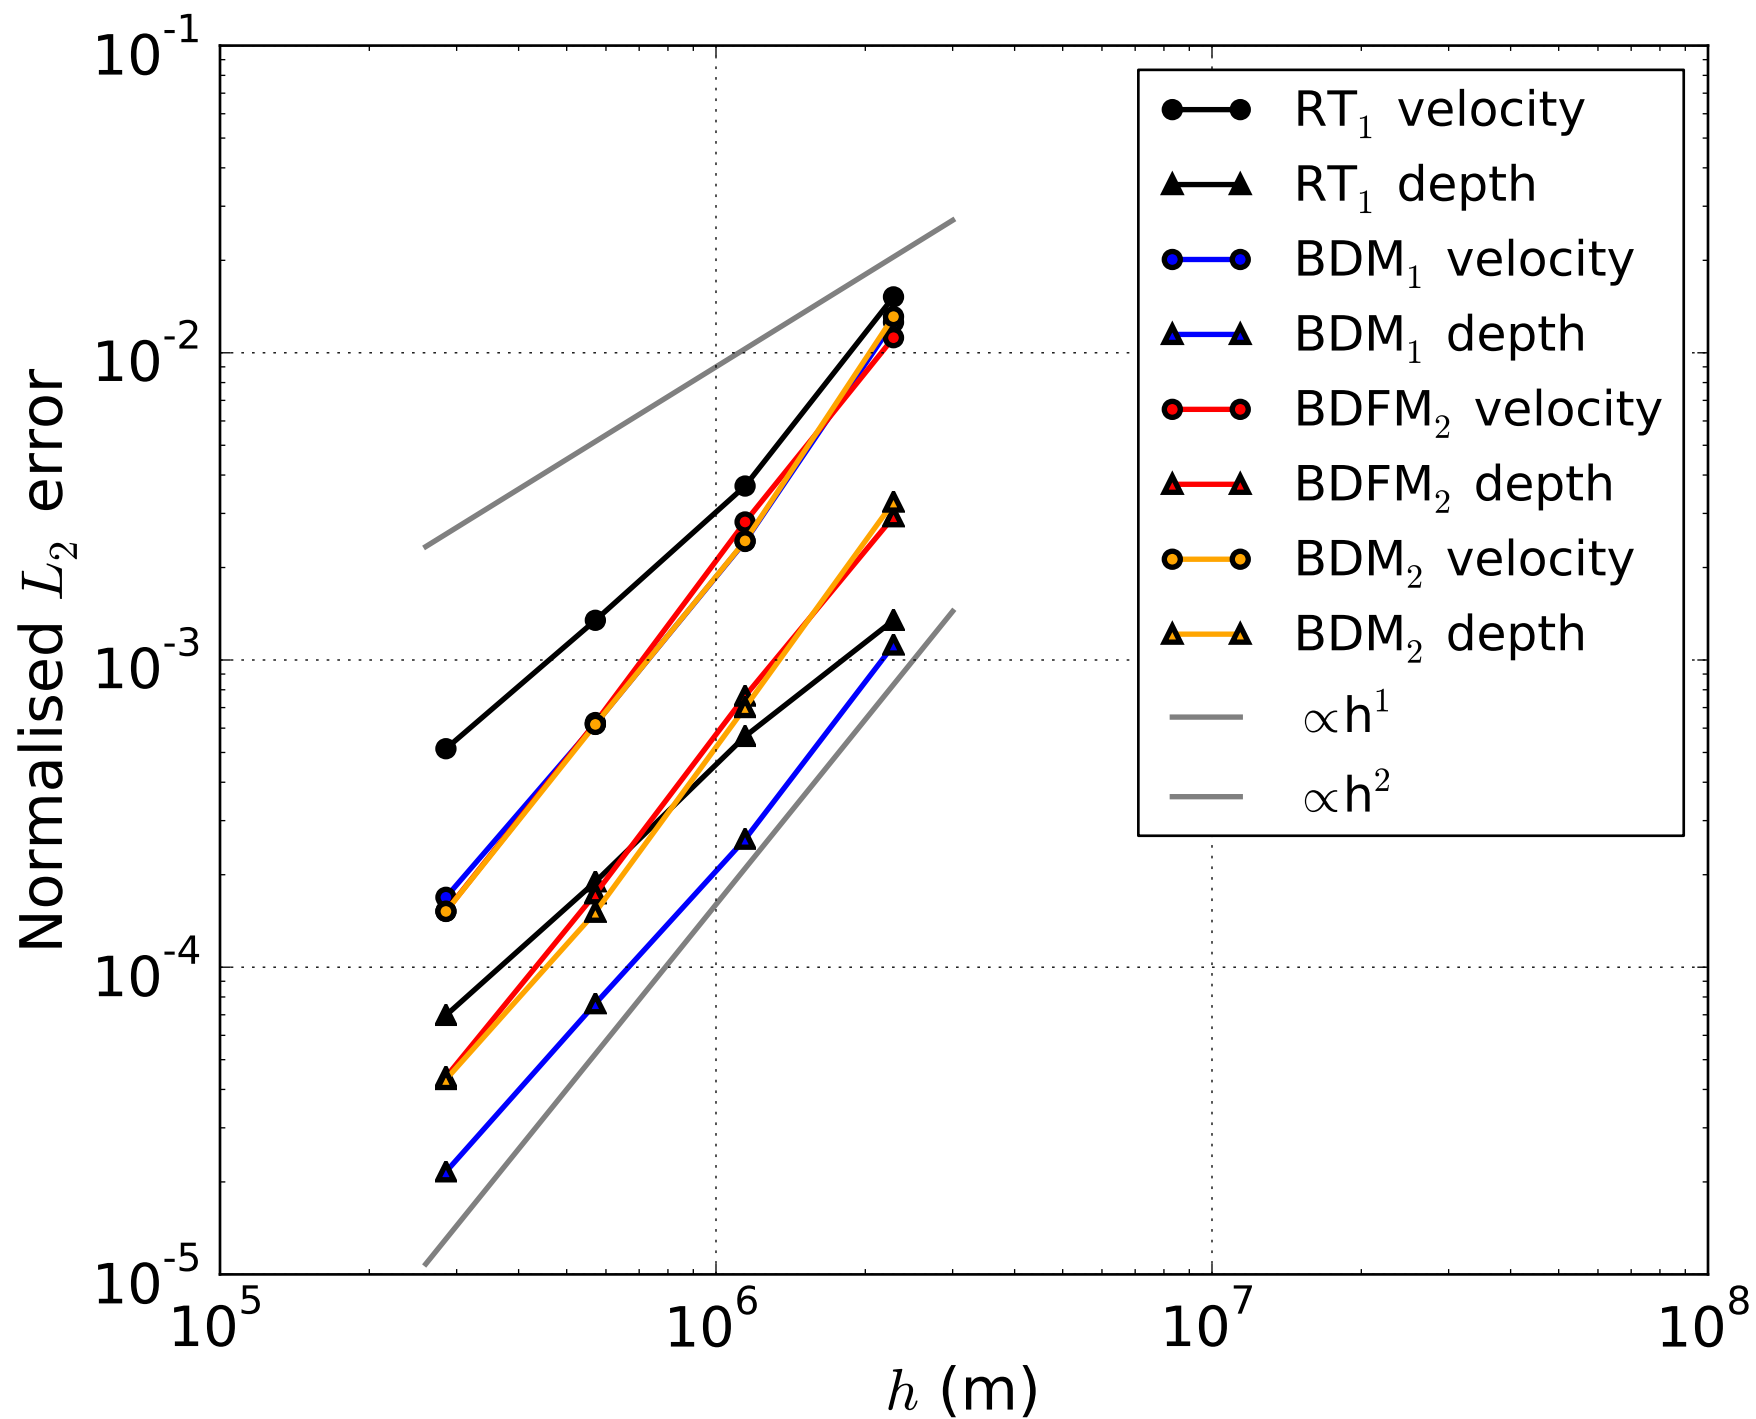

Supplement: Supplementary file 6 [file gmd-6-2099-2013-supplement.zip]

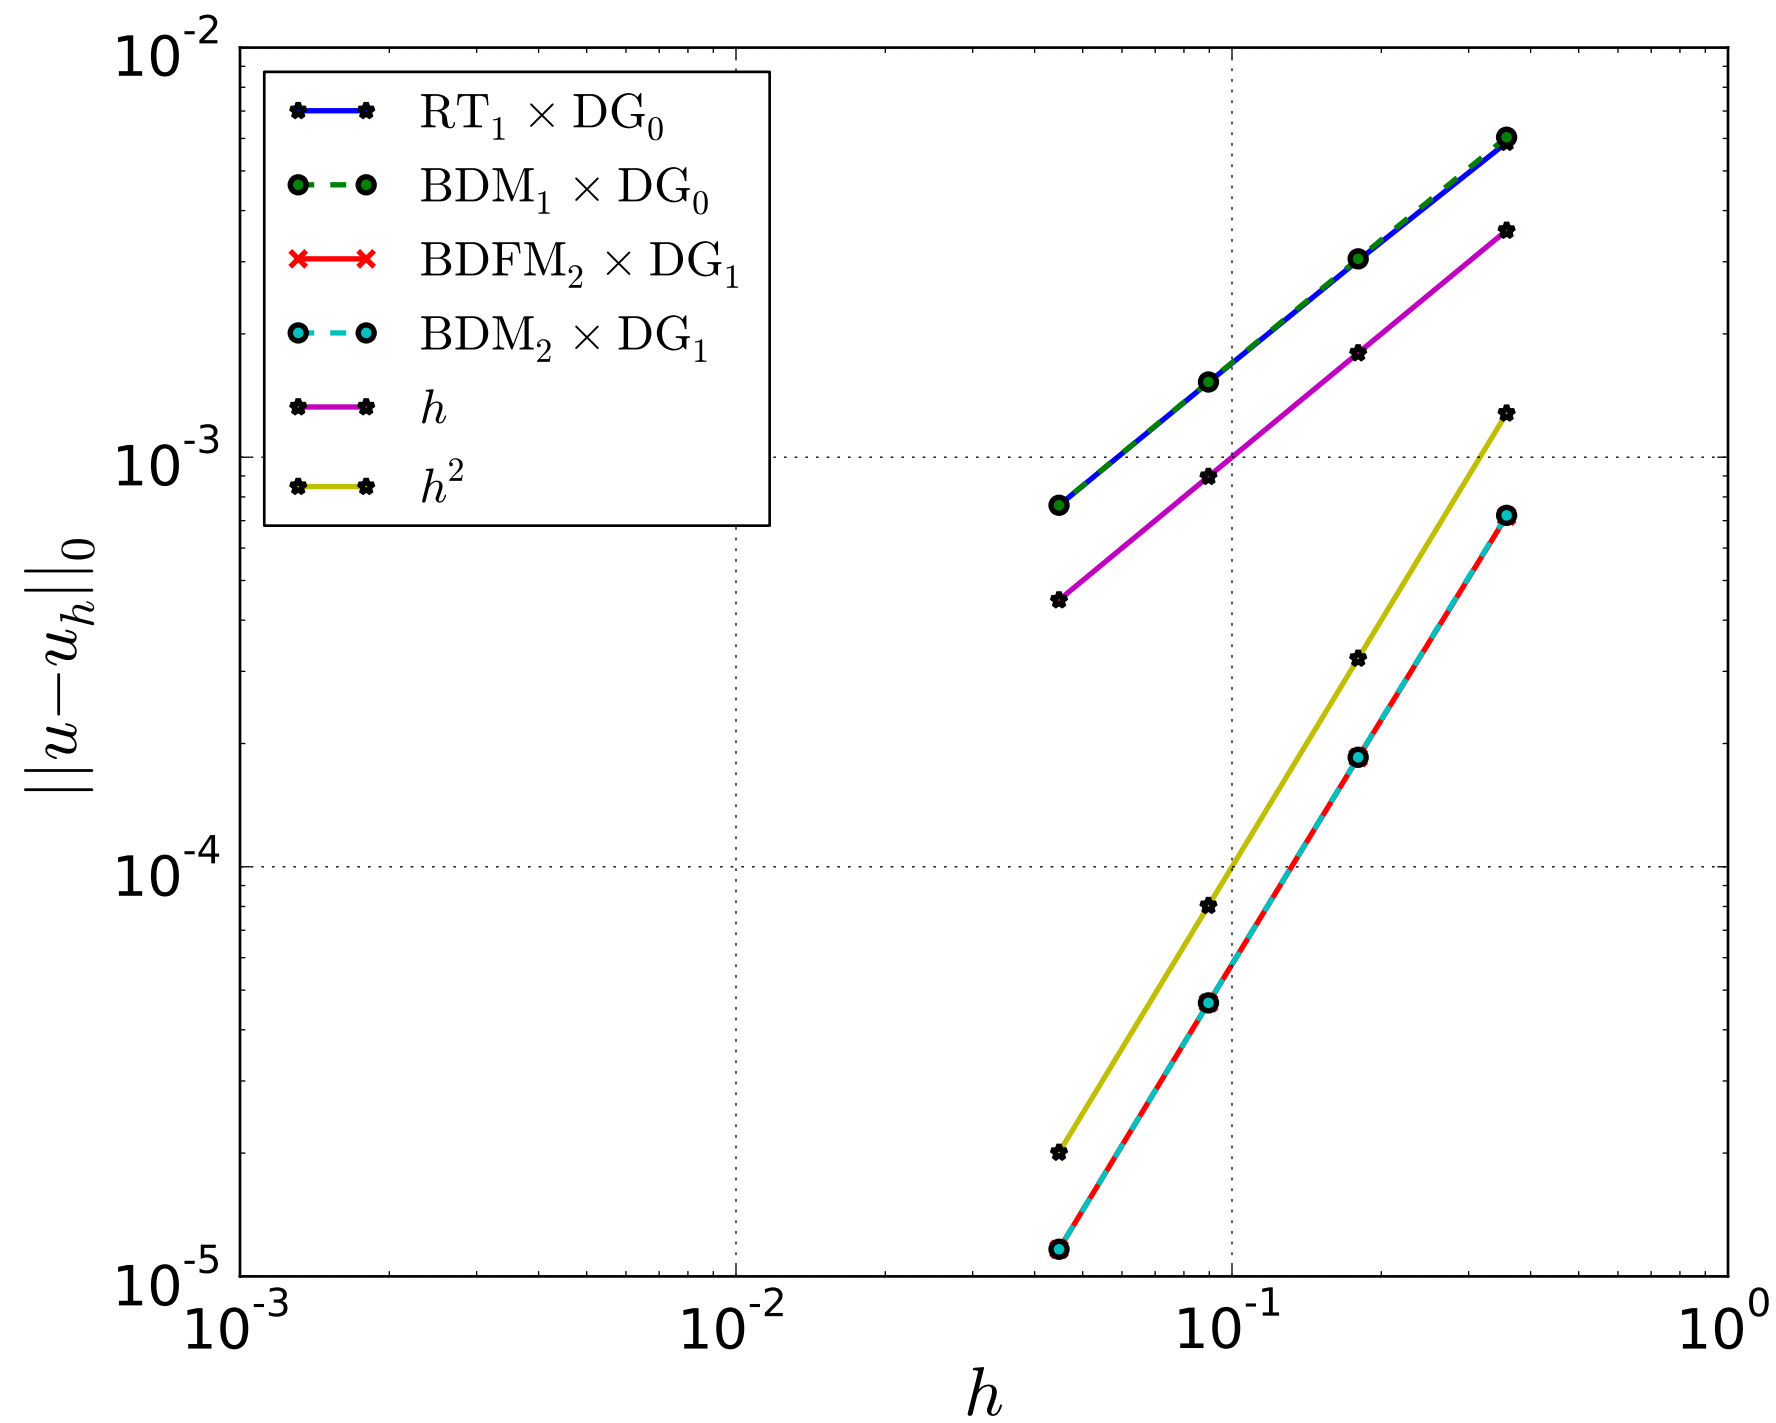

Supplement: Supplementary file 7 [file gmd-6-2099-2013-supplement.zip]
